# Supplementary material
Source: PubMed Central journal article supplement (PMC7364669)

SUPPLEMENTARY DATA

**Supplementary Table 1.** ACCORD Variables Available for Risk Prediction Model. **Bolded** candidate variables had <10% missing data and were considered in risk prediction models.

| Variable Domain            | Individual Variables                                                                                                                                                                                                                                                                                                                                                                                                                                                                                                                                                                                                                                                                                                                                                                                                                                                                                                                                                                                                                                                                                                                                                                                                                                                                                                                                                                                                                                                                                                                                                                                                 |
|----------------------------|----------------------------------------------------------------------------------------------------------------------------------------------------------------------------------------------------------------------------------------------------------------------------------------------------------------------------------------------------------------------------------------------------------------------------------------------------------------------------------------------------------------------------------------------------------------------------------------------------------------------------------------------------------------------------------------------------------------------------------------------------------------------------------------------------------------------------------------------------------------------------------------------------------------------------------------------------------------------------------------------------------------------------------------------------------------------------------------------------------------------------------------------------------------------------------------------------------------------------------------------------------------------------------------------------------------------------------------------------------------------------------------------------------------------------------------------------------------------------------------------------------------------------------------------------------------------------------------------------------------------|
| Demographic/Anthropometric | <b>Age, sex, race, body mass index, systolic blood pressure, diastolic blood pressure, heart rate, randomized treatment arm, body mass index, waist circumference</b>                                                                                                                                                                                                                                                                                                                                                                                                                                                                                                                                                                                                                                                                                                                                                                                                                                                                                                                                                                                                                                                                                                                                                                                                                                                                                                                                                                                                                                                |
| Clinical/Medical History   | <b>Systolic blood pressure, diastolic blood pressure, heart rate, History of myocardial infarction, stroke, coronary artery bypass graft surgery, cardiovascular disease, percutaneous coronary intervention/atherectomy, albuminuria, low ankle-brachial index, current smoker, level of education, years of diabetes mellitus, hypertension, hyperlipidemia, family history of heart failure, hypoglycemic event requiring medical assistance, hypoglycemic event requiring any assistance, neuropathy, vibration sensation loss, pressure sensation loss, Mini-Mental State Examination total score, Denver Developmental Screening Test total score, Stroop score, Rey Auditory Verbal Learning Test score, former cigarette smoker, lives with one or more people, foot ulcer requiring antibiotics, number of alcoholic drinks per week, Health Utilities Index Mark3 score, Health Utilities Index Mark2 score, physical health survey, mental health survey, diet summary score, total exercise expenditure calories/week, total moderate-intensive exercise expenditure calories/week, documented blood glucose &lt;50mg/dl, serum creatinine doubling, right leg pre-tibial edema, left leg pre-tibial edema, amputation of lower extremity, photocoagulation, cataract extraction, severe vision loss, Michigan Neuropathy Screening Instrument score, visual acuity score R eye, visual acuity score L eye, depression, eye disease, full insurance benefits, partial insurance benefits, foot appearance, ankle reflexes, neuropathy screening instrument score, feeling score, nutrition education</b> |
| Laboratory                 | <b>Potassium, serum creatinine, glycated hemoglobin, total cholesterol, triglycerides, very low-density lipoprotein, low-density lipoprotein, HDL-C, fasting plasma glucose, alanine aminotransferase, creatine kinase, estimated glomerular filtration rate, urinary albumin, urinary creatinine</b>                                                                                                                                                                                                                                                                                                                                                                                                                                                                                                                                                                                                                                                                                                                                                                                                                                                                                                                                                                                                                                                                                                                                                                                                                                                                                                                |
| Baseline Medications       | <b>Loop diuretic, thiazide diuretic, potassium-sparing diuretic, angiotensin II receptor blocker, angiotensin-converting enzyme inhibitor, dihydropyridine calcium channel blockers, non-dihydropyridine calcium channel blockers, alpha-blockers, beta-blockers, vasodilators, reserpine, digitalis, anti-arrhythmic therapies, nitrates, sulfonylureas, biguanides, meglitinides, alpha-glucosidase inhibitors, NPH insulin, thiazolidinediones, regular insulin, Lispro/Aspart insulin, premixed insulin, bile-acid sequestrants, statins, fibrates, cholesterol absorption inhibitors, niacin, oral anticoagulants, nonsteroidal anti-inflammatory drugs, cyclooxygenase-2 inhibitors, aspirin,</b>                                                                                                                                                                                                                                                                                                                                                                                                                                                                                                                                                                                                                                                                                                                                                                                                                                                                                                              |

SUPPLEMENTARY DATA

|                                  |                                                                                                                                                                                                                                                                                                          |
|----------------------------------|----------------------------------------------------------------------------------------------------------------------------------------------------------------------------------------------------------------------------------------------------------------------------------------------------------|
|                                  | <b>thyroid agent, progestins, estrogens, oral asthma drugs, any antidepressant, drugs for osteoporosis, vitamins, over-the-counter medication, herbal medication</b>                                                                                                                                     |
| Neuro Magnetic Resonance Imaging | Intracranial volume, basal ganglia normal, basal ganglia abnormal, gray mater normal, white matter normal, gray matter abnormal, white matter abnormal, brain volume normal, brain volume abnormal, gray matter total, white matter total                                                                |
| Electrocardiographic             | ST-segment depression anterolateral, posterior, anterior, T-wave inversion, AV conduction defect, <b>PR interval, QRS duration, QTc interval, QRS-axis, P-axis, T-axis, R-wave amplitude (lead aVL), S-wave amplitude (lead V3), left ventricular hypertrophy (Cornell Voltage), atrial fibrillation</b> |

---

SUPPLEMENTARY DATA

**Supplementary Table 2.** Identified variables in each of the three variable selection methods: random survival forest (RSF), stepwise forward selection, and stepwise backwards selection.

| <b>Random Survival Forest (RSF)</b> | <b>Stepwise Forward Selection</b> | <b>Stepwise Backwards Selection</b> |
|-------------------------------------|-----------------------------------|-------------------------------------|
| Age                                 | Age                               | Age                                 |
| T-wave axis*                        | T-wave axis*                      | T-wave axis*                        |
| QTc duration*                       | Hemoglobin A1c*                   | Hemoglobin A1c*                     |
| Diastolic blood pressure            | Serum creatinine                  | Urine albumin                       |
| Hemoglobin A1c*                     | Diastolic blood pressure          | Serum creatinine                    |
| Serum creatinine                    | QTc duration*                     | Serum potassium                     |
| HDL-C                               | History of MI                     | QRS duration                        |
| QRS duration                        | PR duration*                      | Fasting plasma glucose              |
| Body mass index                     | Urine creatinine                  | History of MI                       |
| History of MI                       | HDL-C                             | History of CABG                     |
| Fasting plasma glucose              | Body mass index                   | PR duration*                        |
| History of CABG                     | QRS duration                      | Urine creatinine                    |
| Systolic blood pressure             |                                   | HDL-C                               |
|                                     |                                   | Diastolic blood pressure            |

\* Indicates the variable was removed from the relationship modeling step as the variable was not a routine clinical marker, clinically similar to other variables, or not available in the validation dataset.

SUPPLEMENTARY DATA

**Supplementary Table 3.** Cox proportional hazard parameter estimates for the estimated 5-year risk of HF.

| <b>Variable</b>                 | <b><math>\beta</math>-estimate</b> | <b>Hazard Ratio<br/>(95% Confidence Interval)</b> | <b>P-value</b> |
|---------------------------------|------------------------------------|---------------------------------------------------|----------------|
| Age                             | 0.039                              | 1.04 (1.02-1.06)                                  | <0.001         |
| Fasting plasma glucose          | 0.002                              | 1.00 (1.00-1.01)                                  | 0.03           |
| Body mass index                 | 0.057                              | 1.06 (1.04-1.08)                                  | <0.001         |
| Systolic blood pressure         | 0.015                              | 1.02 (1.01-1.02)                                  | <0.001         |
| Diastolic blood pressure        | -0.025                             | 0.98 (0.96-0.99)                                  | <0.001         |
| Serum creatinine                | 0.710                              | 2.03 (1.31-3.16)                                  | 0.002          |
| HDL-C                           | -0.023                             | 0.98 (0.97-0.99)                                  | <0.001         |
| QRS duration ( $\geq 120$ msec) | 0.583                              | 1.79 (1.31-2.45)                                  | <0.001         |
| History of MI                   | 0.600                              | 1.82 (1.37-2.41)                                  | <0.001         |
| History of CABG                 | 0.673                              | 1.96 (1.46-2.64)                                  | <0.001         |

Baseline survival: 0.97358

SUPPLEMENTARY DATA

**Supplementary Table 4.** Baseline characteristics for both the ACCORD and ALLHAT datasets.

|                                                    | <b>ACCORD<br/>(n=8,756)</b> | <b>ALLHAT<br/>(n=10,819)</b> | <b>P-value</b> |
|----------------------------------------------------|-----------------------------|------------------------------|----------------|
| Female, %                                          | 3370 (38.5)                 | 5306 (49.0)                  | <0.01          |
| Age (years), %                                     | 62.7 (6.6)                  | 67.0 (7.3)                   | <0.01          |
| Race, %                                            |                             |                              | <0.01          |
| Black                                              | 1622 (18.5)                 | 4109 (38.0)                  |                |
| Other                                              | 1645 (18.8)                 | 580 (5.4)                    |                |
| White                                              | 5489 (62.7)                 | 6130 (56.7)                  |                |
| Systolic blood pressure (mmHg), sd                 | 136.4 (16.9)                | 144.7 (13.5)                 | <0.01          |
| Diastolic blood pressure (mmHg), sd                | 75.0 (10.5)                 | 82.0 (9.9)                   | <0.01          |
| Body mass index (kg/m <sup>2</sup> ), sd           | 32.1 (5.4)                  | 31.0 (6.0)                   | <0.01          |
| QRS duration (>120 ms), %                          | 636 (7.3)                   | 806 (7.4)                    | 0.64           |
| LV hypertrophy <sup>1</sup> , %                    | 332 (3.8)                   | 983 (9.1)                    | <0.01          |
| Fasting plasma glucose (md/dL), sd                 | 175.2 (55.9)                | 172.4 (74.5)                 | 0.18           |
| Potassium (md/dL), sd                              | 4.5 (0.5)                   | 4.4 (0.7)                    | 0.39           |
| Serum creatinine (md/dL), sd                       | 0.9 (0.2)                   | 1.0 (0.3)                    | 0.31           |
| Estimated glomerular filtration rate (mL/min), sd  | 91.5 (27.3)                 | 80.7 (21.4)                  | <0.01          |
| Total cholesterol (mg/dL), sd                      | 183.6 (41.7)                | 215.4 (45.5)                 | <0.01          |
| Triglycerides (md/dL), sd                          | 190.6<br>(149.8)            | 191.1<br>(153.0)             | 0.87           |
| Low-density lipoprotein cholesterol (md/dL), sd    | 105.1 (33.9)                | 134.1 (38.8)                 | <0.01          |
| HDL-C (md/dL), sd                                  | 41.9 (11.5)                 | 44.8 (12.4)                  | <0.01          |
| History of myocardial infarction, %                | 1237 (14.1)                 | 2063 (19.1)                  | <0.01          |
| History of stroke, %                               | 502 (5.7)                   | 728 (6.7)                    | 0.29           |
| History of coronary artery bypass graft surgery, % | 918 (10.5)                  | 1141 (10.5)                  | 0.91           |
| Current cigarette smoker, %                        | 1078 (12.3)                 | 1342 (12.4)                  | 0.86           |

<sup>1</sup>Determined by Cornell Voltage criteria

SUPPLEMENTARY DATA

**Supplementary Figure 1.** The analysis flow for developing and validating models.

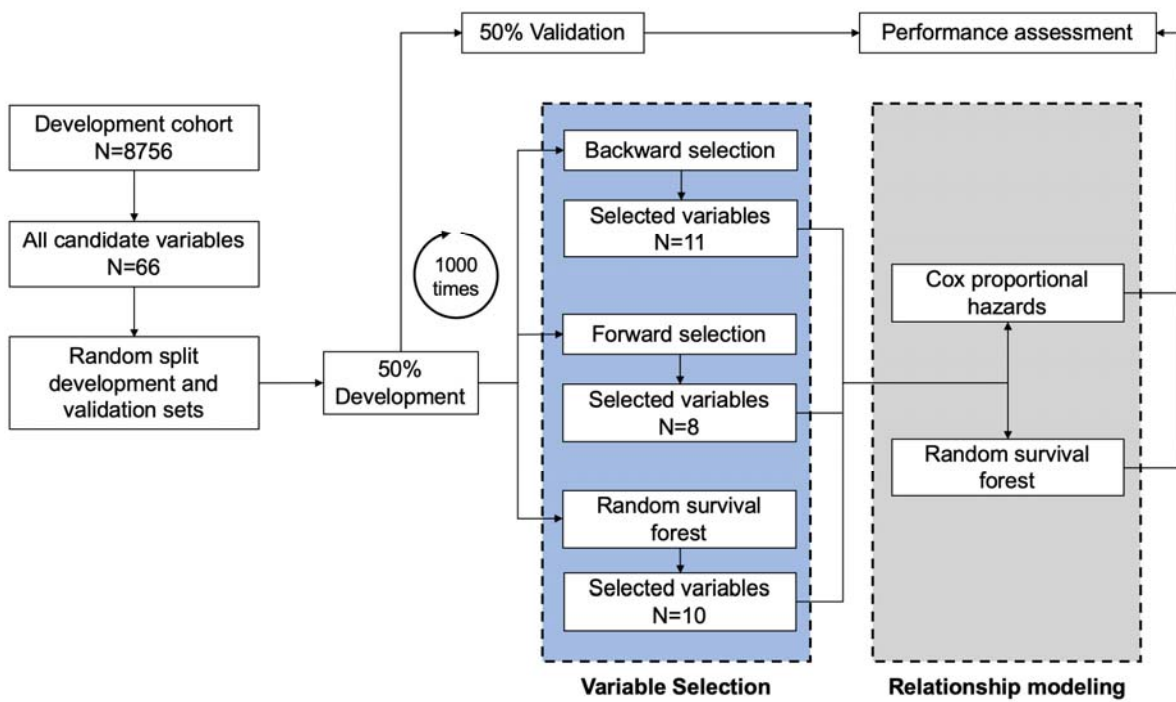

SUPPLEMENTARY DATA

**Supplementary Figure 2.** Calibration of the WATCH-DM risk score for the integer-based, Cox regression-based, and RSF-based models in the internally validated dataset (ACCORD). Predicted vs observed 5-year incidence of heart failure based on deciles of predicted risk. Calibration was acceptable (Hosmer-Lemeshow statistics  $p \geq 0.20$  for all models).

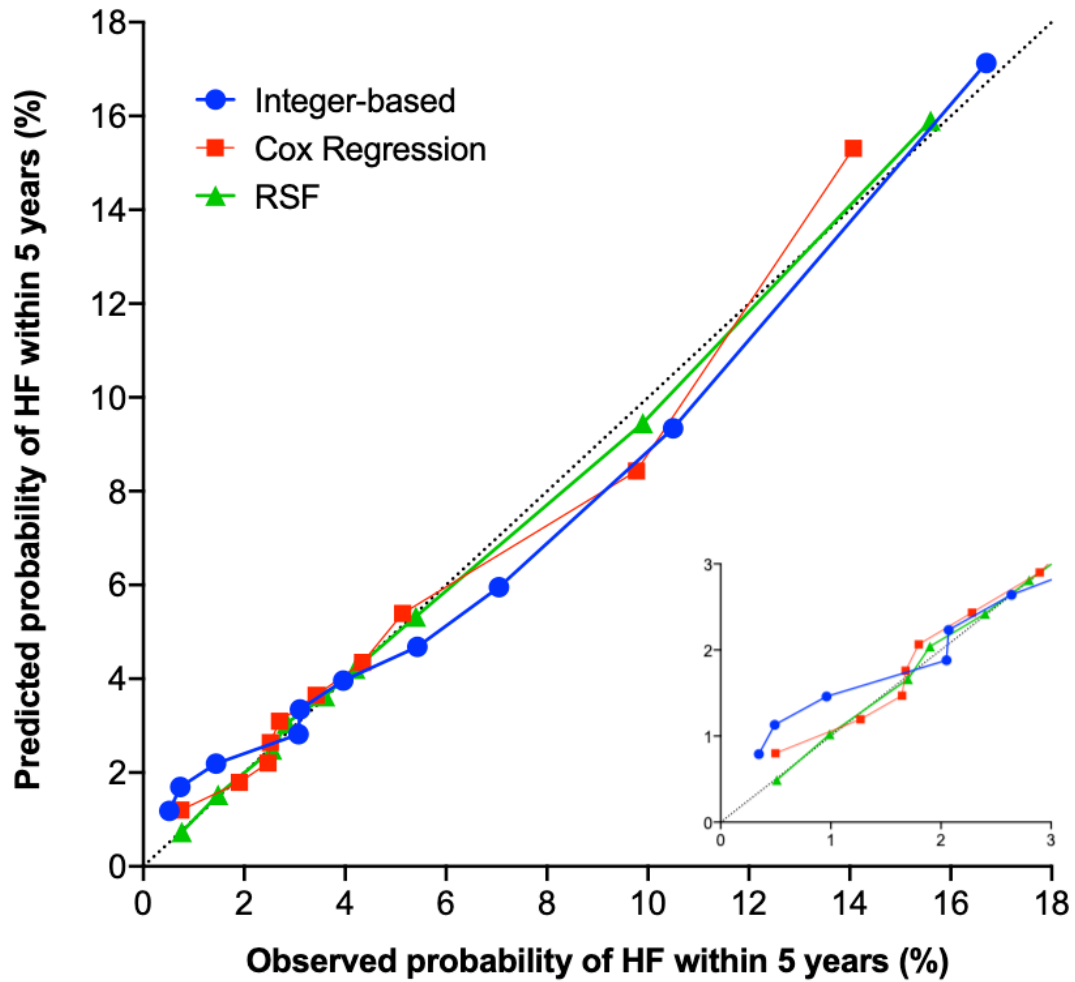

SUPPLEMENTARY DATA

**Supplementary Figure 3.** Calibration of the WATCH-DM risk score for the integer-based, Cox regression-based, and RSF-based models in the externally validated dataset (ALLHAT). Predicted vs observed 5-year incidence of heart failure based on deciles of predicted risk. Calibration was acceptable (Hosmer-Lemeshow statistics  $p \geq 0.10$  for all models).

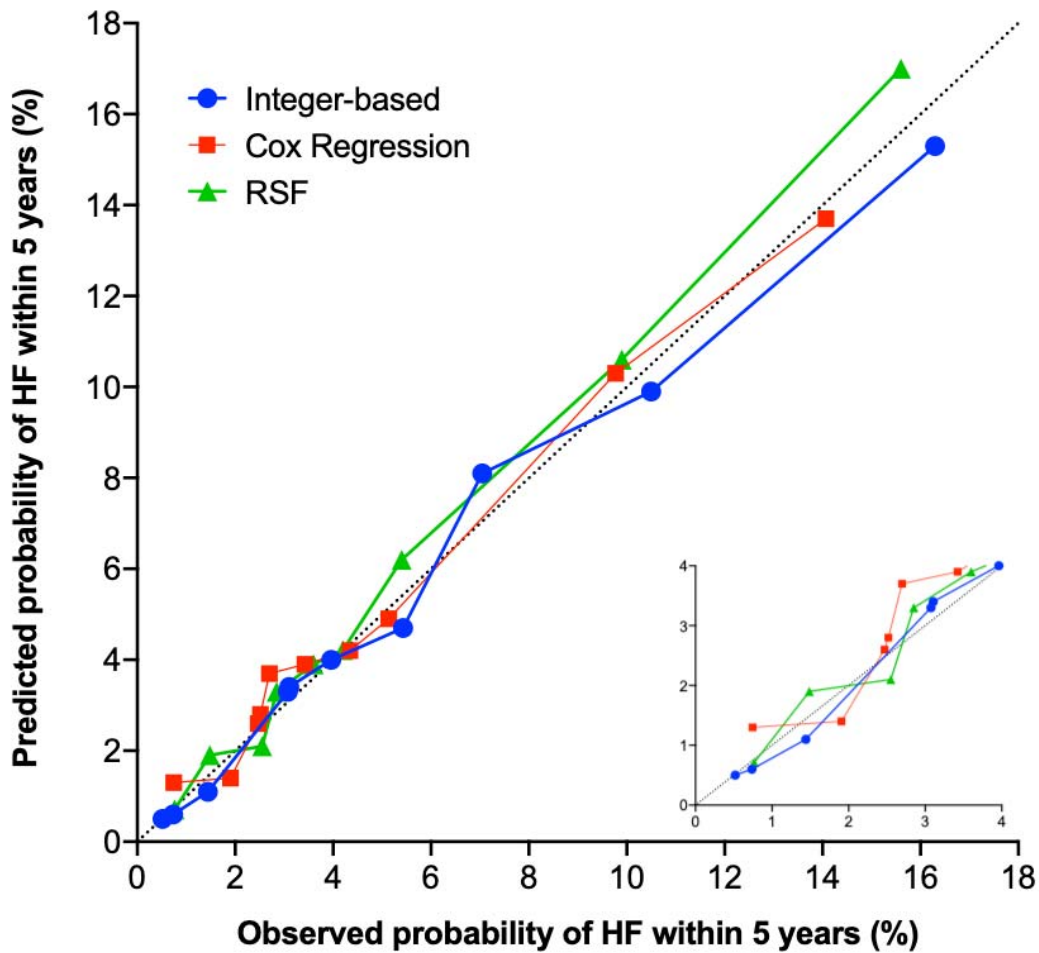



SUPPLEMENTARY DATA

**Supplementary Figure 4.** Cumulative incidence of HF across quintiles of WATCH-DM: Q1 ( $\leq 7$ ); Q2 (8-9); Q3 (10); Q4 (11-13); Q5 ( $\geq 14$ ) in the validation dataset, ALLHAT.

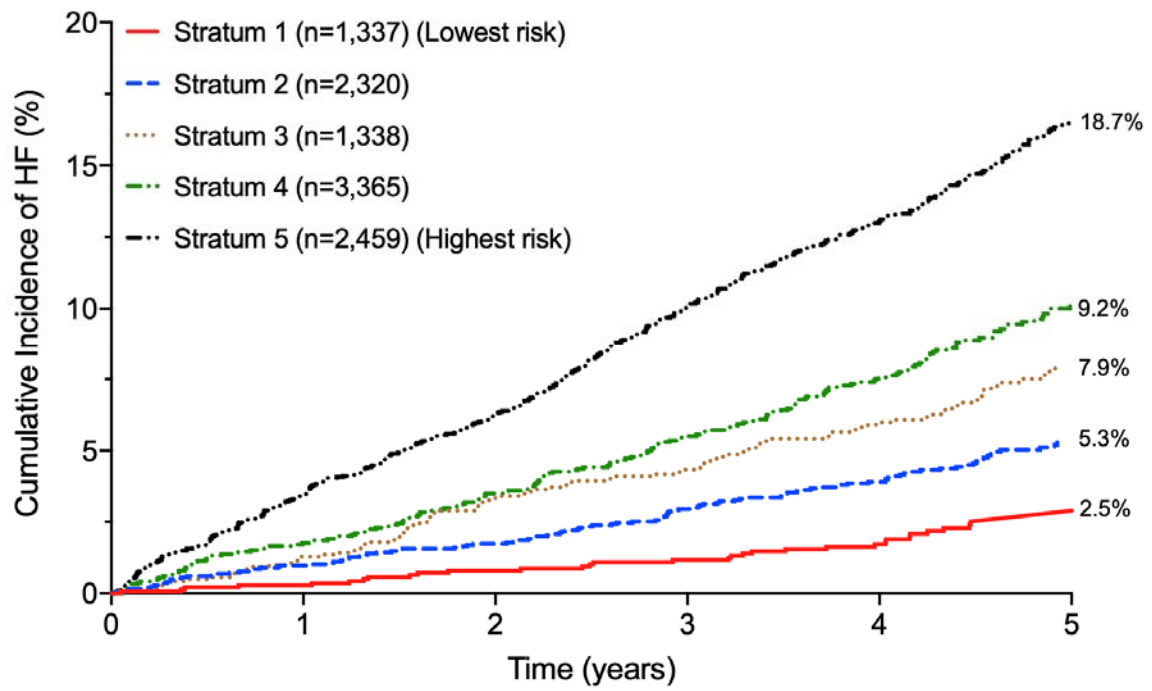

SUPPLEMENTARY DATA

**Supplementary Figure 5.** Kaplan-Meier curves for HF events by phenotype in the ALLHAT (external validation) cohort. The *p*-value was calculated using the *logrank* test.

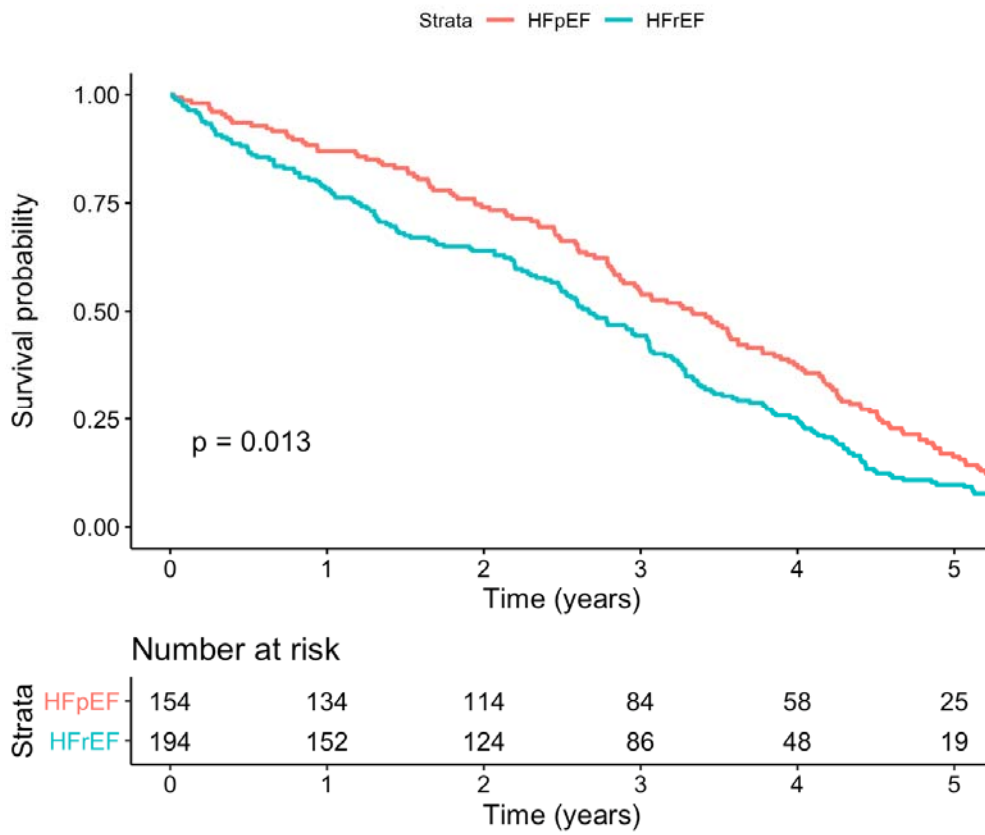

SUPPLEMENTARY DATA

**Supplementary Figure 6.** Cumulative incidence curves for incident HF in each of the 5 risk strata by HF phenotype in the external validation (ALLHAT) dataset.

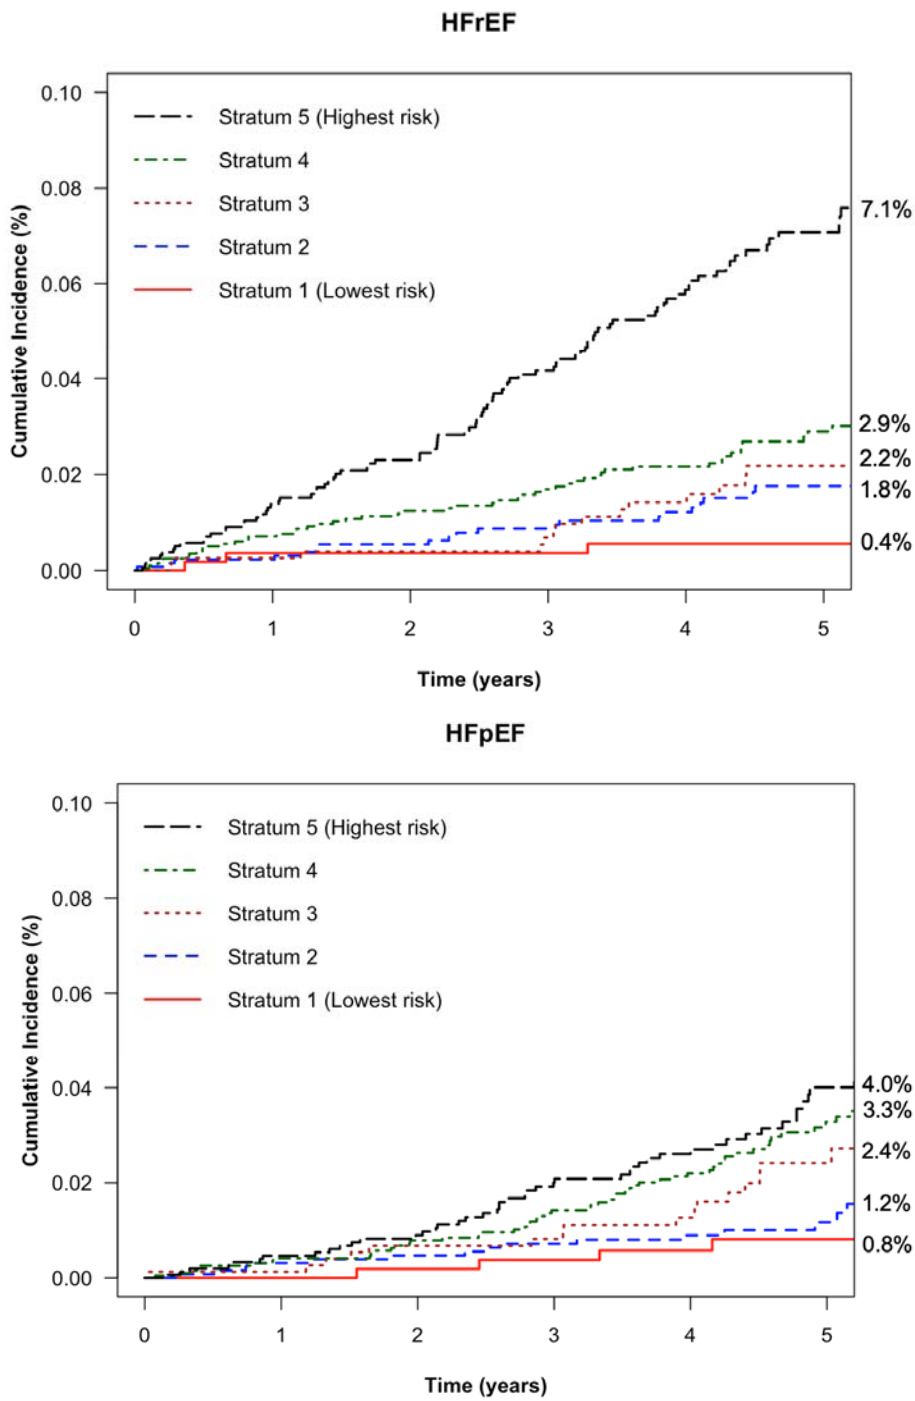

Supplement: DC190587SupplementaryData.pdf [file DC190587SupplementaryData.pdf]
